# Supplementary material for: Effects of the Aging Period and Method on the Physicochemical, Microbiological and Rheological Characteristics of Two Cuts of Charolais Beef
Source: MDPI journal article supplement (doi:10.3390/foods12030531), 2023-01-25
Supplement: s1 [file s1]

Effects of the Aging Period and Method on the Physicochemical, Microbiological and Rheological Characteristics of Two Cuts of Charolais Beef – Supplementary materials

**Table S1.** Effects of variables (T = aging time, M = aging method and S = states of meat (raw or cooked)) on the changes in texture profile analysis (TPA) and Warner-Bratzler shear force (WBSF).

|                      | Effect |     |     |     |     |       |
|----------------------|--------|-----|-----|-----|-----|-------|
|                      | T      | M   | S   | T×M | T×S | T×M×S |
| WBSF, Kg             | **     | NS  | *** | NS  | NS  | NS    |
| Hardness,<br>N       | NS     | *** | *** | NS  | NS  | NS    |
| Gumminess,<br>N      | NS     | *** | *** | NS  | NS  | NS    |
| Chewiness,<br>N x mm | NS     | *** | *** | NS  | NS  | NS    |
| Springiness,<br>mm   | NS     | *** | NS  | NS  | NS  | NS    |
| Resilience           | NS     | NS  | NS  | NS  | NS  | NS    |
| Adhesiveness         | NS     | NS  | *** | NS  | NS  | NS    |

NS = not significant; \*\* =  $p < 0.01$ ; \*\*\* =  $p < 0.001$ .
